# Supplementary material
Source: publisher figshare collection journal article supplement (https://sage.figshare.com/ndownloader/files/14489405)
Supplement: Supplementary file 1 [file 14489405]

**Yoram Z. Haftel & Stephanie C. Hofmann. Forthcoming. "Rivalry and Overlap: Why Regional Economic Organizations Encroach on Security Organizations." Journal of Conflict Resolution**

**Variables Information Sheet**

| **Name of variable in Stata** | **Name of variable in Article** | **Content** |
| --- | --- | --- |
| year | N/A | Year in which security cooperation is coded |
| region | N/A | Name of REO's region |
| nregion | N/A | Nominal value of REO's region |
| nbloc | N/A | Nominal value of REO |
| bloc | N/A | REO's acronym |
| desecurity2 | REO Security Depth | Ordinal DV: 0 (no), 1 (low), 2 (high) security cooperation |
| desecurity_01L | REO Security Cooperation | Dummy DV: 0 (no), 1 (yes) security cooperation |
| rso_1 | RSO Overlap | 1 if REO has an overlapping RSO, 0 otherwise |
| rso_hp | High Preforming RSO Overlap | 1 if REO has an overlapping high performing RSO, 0 otherwise |
| lag_reo_mjrival01 | REO Rivalry | 1 if REO is rivalrous, 0 otherwise |
| lag_rso_mjrival01 | RSO Rivalry | 1 if RSO is rivalrous, 0otherwise |
| lag_gap_mjrival01 | Rivalry Gap | RSO Rivalry – REO Rivalry |
| lag_gap_mjrival01_nato | N/A | Same as Rivalry Gap, but NATO is coded as rivalrous |
| lag_civilwar | Conflict | Sum of all violent conflicts within member-states and between member-states of a given REO (Uppsala Conflict Data Program) |
| lag_concen | Hegemony | Value of concentration ratio of a given REO (based on members' GDP, WPT) |
| lag_delegation | Delegation | Transfer of agenda-setting or decision-making authority to the REO (based on Hooghe et al. 2017) |
| lag_mem | Members | Number of REO's members |
| lag_ipd_std | Ideal Point STD | Standard deviation of the REO members' ideal point distance, based on UN General Assembly (UNGA) voting patterns (Bailey et al. 2017). |
| southx2 | South-South REO | 1 for REOs that include only developing countries, 0 otherwise |
